# Supplementary material for: Relationship between Vitamin Intake and Resilience Based on Sex in Middle-Aged and Older Japanese Adults: Results of the Shika Study
Source: MDPI journal article supplement (doi:10.3390/nu14235042), 2022-11-27
Supplement: s1 [file s1]

**Supplementary Table S1.** Relationship between  $\beta$ -carotene and sex as interaction term on RS

| Model | Factors               | $\beta$ | <i>p</i> - value | OR    | 95%CL |       |
|-------|-----------------------|---------|------------------|-------|-------|-------|
|       |                       |         |                  |       | Lower | Upper |
| 1     | $\beta$ -carotene*sex | 0.000   | < <b>0.001</b>   | 1.000 | 1.000 | 1.000 |
| 2     | $\beta$ -carotene*sex | 0.000   | < <b>0.001</b>   | 1.000 | 1.000 | 1.000 |
| 3     | $\beta$ -carotene*sex | 0.000   | < <b>0.001</b>   | 1.000 | 1.000 | 1.000 |
| 4     | $\beta$ -carotene*sex | 0.000   | < <b>0.001</b>   | 1.000 | 1.000 | 1.000 |

Significant estimates are in bold. Abbreviations: BMI, body mass index; RS, resilience status; OR, odds ratio, CI, confidence interval. Model 1; adjusted for age and BMI, Model 2; adjusted for age, BMI, current smoker, and current drinker. Model 3; adjusted for age, BMI, education, and occupation, Model 4; adjusted for age, BMI, current smoker, current drinker, education, and occupation.

**Supplementary Table S2.** Relationship between vitamin K and sex as interaction term on RS

| Model | Factors        | $\beta$ | <i>p</i> - value | OR    | 95%CL |       |
|-------|----------------|---------|------------------|-------|-------|-------|
|       |                |         |                  |       | Lower | Upper |
| 1     | Vitamin K*sex  | 0.002   | <b>0.004</b>     | 1.002 | 1.001 | 1.004 |
| 2     | Vitamin K *sex | 0.003   | <b>0.003</b>     | 1.003 | 1.001 | 1.004 |
| 3     | Vitamin K *sex | 0.002   | <b>0.003</b>     | 1.002 | 1.001 | 1.004 |
| 4     | Vitamin K *sex | 0.003   | <b>0.003</b>     | 1.003 | 1.001 | 1.004 |

Significant estimates are in bold. Abbreviations: BMI, body mass index; RS, resilience status; OR, odds ratio, CI, confidence interval. Model 1; adjusted for age and BMI, Model 2; adjusted for age, BMI, current smoker, and current drinker. Model 3; adjusted for age, BMI, education, and occupation, Model 4; adjusted for age, BMI, current smoker, current drinker, education, and occupation.
